# Supplementary material for: Habitual dietary intake of IBD patients differs from population controls: a case–control study
Source: PubMed Central journal article supplement (PMC7867519; doi:10.1007/s00394-020-02250-z), 2020-04-24
Supplement: 394_2020_2250_MOESM1_ESM.pdf [file 394_2020_2250_MOESM1_ESM.pdf]

**Table S1.** Categorization of food items into food groups

| English item name                                                  | Dutch item name                                | Food group          |
|--------------------------------------------------------------------|------------------------------------------------|---------------------|
| Beer                                                               | Bier                                           | Alcohol             |
| Red wine                                                           | Rode wijn                                      | Alcohol             |
| White wine                                                         | Witte wijn                                     | Alcohol             |
| Fortified wines: Sherry / port / vermouth / madeira                | Sherry/port/vermouth/madeira                   | Alcohol             |
| Spirit drinks                                                      | Gedestilleerde dranken                         | Alcohol             |
| Other types of alcoholic drinks                                    | Overige soorten alcoholische dranken           | Alcohol             |
| Plain rusks / crisp bread / crackers                               | Beschuit/knäckebroöd/crackers                  | Breads              |
| Croissants / other breads                                          | Croissants/andere broodjes                     | Breads              |
| Slices of bread / sandwich bread                                   | Snedes brood                                   | Breads              |
| Granola / muesli / cereals                                         | Muesli/cruesli/granen voor pappen              | Cereals             |
| 20+/30+ cheese/cheese spreads                                      | 20+/30+ kaas/smeerkaas                         | Cheese              |
| 40+ cheese/cheese spreads                                          | 40+ kaas/smeerkaas                             | Cheese              |
| 48+ full-fat cheese/cheese spreads                                 | 48+ volvette kaas/smeerkaas                    | Cheese              |
| Cream cheese / foreign cheeses                                     | Roomkaas/buitenlandse kaas                     | Cheese              |
| Cheese added to dinner                                             | Kaas bij warme maaltijd                        | Cheese              |
| Cheese in-between meals                                            | Kaas tussendoor                                | Cheese              |
| Coffee                                                             | Koffie                                         | Coffee              |
| Ready-made breakfast drinks                                        | Kant en klaar drinkontbijt                     | Dairy               |
| Whole milk                                                         | Volle melk                                     | Dairy               |
| Reduced-fat / semi-skimmed milk                                    | Halfvolle melk                                 | Dairy               |
| Low-fat / skimmed milk                                             | Magere melk                                    | Dairy               |
| Buttermilk                                                         | Karnemelk                                      | Dairy               |
| Chocolatemilk                                                      | Chocolademelk                                  | Dairy               |
| Drinking yoghurt / milk drink with flavor and sugar                | Drinkyoghurt/zuiveldrank met smaakje en suiker | Dairy               |
| Other types of dairy drinks                                        | Overige soorten zuiveldrank                    | Dairy               |
| Whole pudding/custard                                              | Volle vla                                      | Dairy               |
| Whole natural yoghurt                                              | Volle naturel yoghurt                          | Dairy               |
| Low-fat / skimmed natural yoghurt                                  | Magere naturel yoghurt                         | Dairy               |
| Low-fat / skimmed (fruit) yoghurt                                  | Magere (vruchten)yoghurt                       | Dairy               |
| Quark / curd / fruitcurd                                           | Kwark/vruchtenkwark                            | Dairy               |
| Ready-made pap / porridge                                          | Kant en klaar pap                              | Dairy               |
| Other types of pudding / custard / yoghurt / curd / quark products | Overige soorten vla/yoghurt/kwark              | Dairy               |
| Ice cream / milk-based ice                                         | Roomijs/ijs op melkbasis                       | Dairy               |
| Whipped cream                                                      | Slagroom                                       | Dairy               |
| Halvamel                                                           | Halvamel                                       | Dairy               |
| Coffee creamer                                                     | Koffiecreamer                                  | Dairy               |
| Whole coffee milk                                                  | Volle koffiemelk                               | Dairy               |
| Ordinary milk (for coffee)                                         | Gewone melk (koffie)                           | Dairy               |
| Other types of milk / dairy                                        | Overige soorten melk (koffie)                  | Dairy               |
| Boiled eggs                                                        | Gekookt ei                                     | Eggs                |
| Fried eggs                                                         | Gebakken ei                                    | Eggs                |
| Salty herring                                                      | Zoute haring                                   | Fish                |
| Fried haddock fillet / fried cod bits                              | Lekkerbekje/kibbeling                          | Fish                |
| Low-fat / whitefish                                                | Magere vis                                     | Fish                |
| Fatty fish                                                         | Vette vis                                      | Fish                |
| Other types of fish                                                | Overige soorten vis                            | Fish                |
| Self prepared fish with fat                                        | Vis zelf bereid met vet                        | Fish                |
| Fresh fruit                                                        | Vers fruit                                     | Fruits              |
| Apple sauce                                                        | Appelmoes                                      | Fruits              |
| Fruit juice                                                        | Vruchtensap/-drank                             | Fruits              |
| Legumes                                                            | Peulvruchten                                   | Legumes             |
| Sausage / bacon (cold cuts)                                        | Worst/speksoorten (brood)                      | Meat                |
| Other types of cold cut meat and sausages                          | Overige soorten vleeswaren (brood)             | Meat                |
| Mince meat                                                         | Gehakt                                         | Meat                |
| Smoked sausage                                                     | Rookworst                                      | Meat                |
| Steak / roast beef / ox meat                                       | Biefstuk/rosbief/runderlap etc.                | Meat                |
| Meat olives / braised meat                                         | Blinde vink/doorregen runderlap etc.           | Meat                |
| Pork steak / fried rice meat / schnitzel                           | Hamlap/nasivlees/schnitzel etc.                | Meat                |
| Pork fillet / pork chops                                           | Varkensfilet/karbonade etc.                    | Meat                |
| Pork belly / bacon                                                 | Slavink/speklap/spekjes etc.                   | Meat                |
| Chicken                                                            | Kip                                            | Meat                |
| Other types of meats or poultry                                    | Overige soorten vlees of gevogelte             | Meat                |
| Gravy                                                              | Jus                                            | Meat                |
| Cold meats and sausages (cold cuts) in-between meals               | Worst/vleeswaren tussendoor                    | Meat                |
| Soda / lemonade with sugar                                         | Frisdranken/limonade met suiker                | Nonalcoholic drinks |
| Diet soda / lemonade without sugar                                 | Light frisdranken/limonade zonder suiker       | Nonalcoholic drinks |
| Non-alcoholic beer                                                 | Alcoholvrij bier                               | Nonalcoholic drinks |
| Peanutbutter                                                       | Pindakaas                                      | Nuts                |
| Nuts added to dinner                                               | Pinda's/noten bij warme maaltijd               | Nuts                |
| Nuts in-between meals                                              | Pinda's/noten tussendoor                       | Nuts                |
| Pasta                                                              | Pasta                                          | Pasta               |
| Small cookies / biscuits                                           | Kleine koekjes/biscuitjes                      | Pastry              |
| Cake / large cookies                                               | Cake/grote koeken                              | Pastry              |
| Pastry / pie                                                       | Gebak/taart                                    | Pastry              |
| Gingerbread / cake bars / food biscuits                            | Ontbijtkoek/koekrepen/voedingsbiscuits         | Pastry              |
| Cooked potatoes / mashed potatoes                                  | Gekookte aardappelen/puree                     | Potatoes            |
| French fries / baked potatoes                                      | Frites/gebakken aardappelen                    | Potatoes            |
| Chinese / Indian ready-made meals                                  | Chinees/indische k&k                           | Prepared meals      |
| Fast food                                                          | Fast-food maaltijden                           | Prepared meals      |

|                                                                     |                                                 |                |
|---------------------------------------------------------------------|-------------------------------------------------|----------------|
| Other types of ready-made meals                                     | Overige soorten k&k                             | Prepared meals |
| Pizza                                                               | Pizza                                           | Prepared meals |
| Rice                                                                | Rijst                                           | Rice           |
| Warm sauces                                                         | Warme sauzen                                    | Sauces         |
| Mayonnaise                                                          | Mayonnaise                                      | Sauces         |
| Halvanaise / mayonnaise / non-red sauces/condiments                 | Halvanaise/fritessaus/niet-rode sauzen          | Sauces         |
| Dressing / salad dressing                                           | Dressing/slasaus                                | Sauces         |
| Clear dressing without oil                                          | Heldere dressing zonder olie                    | Sauces         |
| Mayonnaise added to snacks                                          | Mayonnaise (snacks)                             | Sauces         |
| Halvanaise / mayonnaise / non-red sauces/condiments added to snacks | Halvanaise/fritessaus/niet-rode sauzen (snacks) | Sauces         |
| Sandwich spreads / salads (on bread)                                | Sandwich spread/salade (brood)                  | savory snacks  |
| Warm savory snacks                                                  | Warme hartige snacks                            | savory snacks  |
| Potato crisps / salty snacks / pretzels                             | Chips/zoutjes                                   | savory snacks  |
| Sandwich spreads / salads on French bread / toast                   | Salades op stokbrood/toast                      | savory snacks  |
| Soup with legumes                                                   | Soep met peulvruchten                           | Soup           |
| Soup without legumes                                                | Soep zonder peulvruchten                        | Soup           |
| Butter / margarine (for bread)                                      | Roomboter/margarine (brood)                     | Spreads        |
| Low-fat margarine (for bread)                                       | Halvarine (brood)                               | Spreads        |
| Other spreads (for bread)                                           | Overige soorten smeersel (brood)                | Spreads        |
| Chocolate spreads / sprinkles (for bread)                           | Chocoladebeleg                                  | Sugar/Sweets   |
| Other types of sweet spread / sprinkles (for bread)                 | Overige soorten zoet beleg                      | Sugar/Sweets   |
| Sugar / syrup (for yoghurt)                                         | Suiker/siroop in yoghurt ed.                    | Sugar/Sweets   |
| Sugar (for coffee)                                                  | Suiker in koffie                                | Sugar/Sweets   |
| Sugar / honey (for tea)                                             | Suiker/honing in thee                           | Sugar/Sweets   |
| Candy bars                                                          | Candybars                                       | Sugar/Sweets   |
| Chocolate                                                           | Chocolade                                       | Sugar/Sweets   |
| Candy                                                               | Snoep                                           | Sugar/Sweets   |
| Tea                                                                 | Thee                                            | Tea            |
| Cooked vegetables without butter                                    | Gekookte groente zonder boter                   | Vegetables     |
| Stir-fried vegetables                                               | Gewokte groente                                 | Vegetables     |
| Cooked vegetables with butter                                       | Gekookte groente met boter                      | Vegetables     |
