# Supplementary material for: Habitual dietary intake of IBD patients differs from population controls: a case–control study
Source: PubMed Central journal article supplement (PMC7867519; doi:10.1007/s00394-020-02250-z), 2020-04-24
Supplement: 394_2020_2250_MOESM2_ESM.pdf [file 394_2020_2250_MOESM2_ESM.pdf]

**Table S2.** Total protein intake of patients and controls

| <b>Protein intake (g/kg)</b> | <b>Disease Phenotype</b> |            | <b>Disease Activity</b> |                       | <b>Controls</b> |
|------------------------------|--------------------------|------------|-------------------------|-----------------------|-----------------|
|                              | <b>UC</b>                | <b>CD</b>  | <b>Remission</b>        | <b>Active Disease</b> |                 |
| Unknown intake*              | 2 (1.0)                  | 2 (0.7)    | 3 (1.2)                 | 1 (0.4)               | 0 (0)           |
| <0.8                         | 82 (39.6)                | 111 (38.8) | 97 (38.6)               | 96 (39.8)             | 373 (28.9)      |
| 0.8-1.2                      | 93 (44.9)                | 129 (45.1) | 108 (43.0)              | 113 (46.9)            | 675 (52.3)      |
| >1.2                         | 30 (14.5)                | 44 (15.4)  | 43 (17.1)               | 31 (12.9)             | 243 (18.8)      |

Data is shown as frequency (%).

\*Protein intake (g/kg) could not be calculated because of missing data on weight (kg).
