# Supplementary material for: Habitual dietary intake of IBD patients differs from population controls: a case–control study
Source: PubMed Central journal article supplement (PMC7867519; doi:10.1007/s00394-020-02250-z), 2020-04-24
Supplement: 394_2020_2250_MOESM3_ESM.pdf [file 394_2020_2250_MOESM3_ESM.pdf]

**Table S3.** Multivariate analysis of food group intake in patients and controls

| Food Groups                    | Disease Phenotype  |       |       |                 |       |       |                |        |       | Disease Activity |       |        |       |       |       |        |
|--------------------------------|--------------------|-------|-------|-----------------|-------|-------|----------------|--------|-------|------------------|-------|--------|-------|-------|-------|--------|
|                                | Ulcerative colitis |       |       | Crohn's disease |       |       | Active disease |        |       | Remission        |       |        |       |       |       |        |
|                                | Exp (B)            | CI    | Sign. | Exp (B)         | CI    | Sign. | Exp (B)        | CI     | Sign. | Exp (B)          | CI    | Sign.  |       |       |       |        |
| Alcohol <sup>1-DP,DA</sup>     | 0.898              | 0.866 | 0.931 | 0.000*          | 0.893 | 0.864 | 0.923          | 0.000* | 0.911 | 0.882            | 0.941 | 0.000* | 0.883 | 0.851 | 0.916 | 0.000* |
| Breads                         | 0.995              | 0.991 | 0.999 | 0.022*          | 0.997 | 0.994 | 1.000          | 0.091  | 0.998 | 0.995            | 1.001 | 0.254  | 0.994 | 0.990 | 0.998 | 0.005* |
| Cereals                        | 1.012              | 0.999 | 1.025 | 0.069           | 0.989 | 0.974 | 1.004          | 0.151  | 0.999 | 0.986            | 1.013 | 0.933  | 0.999 | 0.985 | 1.014 | 0.930  |
| Cheese                         | 1.005              | 0.998 | 1.011 | 0.176           | 1.000 | 0.993 | 1.007          | 0.998  | 1.002 | 0.995            | 1.008 | 0.593  | 1.002 | 0.995 | 1.009 | 0.555  |
| Coffee                         | 0.998              | 0.997 | 0.999 | 0.000*          | 1.000 | 0.999 | 1.001          | 0.919  | 0.999 | 0.998            | 1.000 | 0.005* | 1.000 | 0.999 | 1.000 | 0.323  |
| Dairy <sup>1-DP</sup>          | 0.943              | 0.913 | 0.973 | 0.000*          | 0.920 | 0.894 | 0.945          | 0.000* | 0.998 | 0.997            | 0.999 | 0.000* | 0.998 | 0.997 | 0.999 | 0.000* |
| Eggs                           | 0.998              | 0.986 | 1.011 | 0.807           | 1.004 | 0.994 | 1.015          | 0.407  | 0.999 | 0.987            | 1.011 | 0.915  | 1.009 | 0.998 | 1.021 | 0.094  |
| Fish                           | 1.002              | 0.990 | 1.014 | 0.750           | 1.006 | 0.996 | 1.016          | 0.228  | 0.998 | 0.987            | 1.009 | 0.659  | 1.008 | 0.997 | 1.018 | 0.166  |
| Fruits                         | 0.999              | 0.998 | 1.001 | 0.355           | 1.000 | 0.999 | 1.001          | 0.561  | 1.000 | 0.999            | 1.001 | 0.692  | 1.000 | 0.999 | 1.001 | 0.958  |
| Legumes                        | 1.005              | 0.995 | 1.014 | 0.345           | 1.005 | 0.997 | 1.014          | 0.234  | 1.003 | 0.994            | 1.012 | 0.539  | 1.005 | 0.996 | 1.015 | 0.258  |
| Meat                           | 1.005              | 1.001 | 1.010 | 0.019*          | 1.001 | 0.997 | 1.005          | 0.582  | 1.005 | 1.001            | 1.009 | 0.020* | 1.001 | 0.997 | 1.006 | 0.630  |
| Nonalcoholic drinks            | 1.000              | 0.999 | 1.001 | 0.473           | 1.001 | 1.000 | 1.001          | 0.037* | 1.000 | 1.000            | 1.001 | 0.367  | 1.000 | 1.000 | 1.001 | 0.323  |
| Nuts                           | 0.995              | 0.982 | 1.007 | 0.408           | 0.987 | 0.975 | 0.999          | 0.040* | 1.001 | 0.991            | 1.011 | 0.836  | 0.972 | 0.957 | 0.988 | 0.001* |
| Pasta                          | 0.993              | 0.984 | 1.003 | 0.157           | 0.986 | 0.977 | 0.995          | 0.002* | 0.995 | 0.986            | 1.003 | 0.213  | 0.981 | 0.971 | 0.992 | 0.000* |
| Pastry                         | 1.001              | 0.994 | 1.008 | 0.743           | 0.994 | 0.987 | 1.001          | 0.069  | 0.994 | 0.987            | 1.001 | 0.103  | 0.999 | 0.992 | 1.006 | 0.848  |
| Potatoes                       | 1.002              | 0.999 | 1.005 | 0.267           | 1.004 | 1.001 | 1.007          | 0.021* | 1.001 | 0.998            | 1.004 | 0.529  | 1.005 | 1.002 | 1.008 | 0.004* |
| Prepared meals <sup>1-DA</sup> | 0.999              | 0.995 | 1.002 | 0.426           | 0.993 | 0.990 | 0.997          | 0.001* | 0.793 | 0.731            | 0.861 | 0.000* | 0.831 | 0.762 | 0.906 | 0.000* |
| Rice                           | 0.993              | 0.986 | 1.000 | 0.064           | 0.995 | 0.989 | 1.002          | 0.138  | 0.992 | 0.986            | 0.999 | 0.028* | 0.997 | 0.990 | 1.004 | 0.367  |
| Sauces                         | 1.004              | 0.991 | 1.017 | 0.592           | 0.992 | 0.980 | 1.004          | 0.201  | 0.999 | 0.987            | 1.011 | 0.822  | 0.998 | 0.985 | 1.011 | 0.711  |
| Savory snacks                  | 1.003              | 0.992 | 1.014 | 0.600           | 1.010 | 1.000 | 1.019          | 0.042* | 1.008 | 0.998            | 1.017 | 0.119  | 1.007 | 0.997 | 1.017 | 0.165  |
| Soup                           | 1.002              | 0.999 | 1.005 | 0.200           | 1.001 | 0.999 | 1.004          | 0.340  | 1.003 | 1.000            | 1.005 | 0.033* | 1.000 | 0.997 | 1.003 | 0.932  |
| Spreads                        | 1.019              | 1.004 | 1.035 | 0.016*          | 1.013 | 1.000 | 1.026          | 0.052  | 1.009 | 0.996            | 1.022 | 0.178  | 1.024 | 1.008 | 1.039 | 0.003* |
| Sugar& sweets                  | 1.006              | 1.000 | 1.012 | 0.069           | 1.008 | 1.002 | 1.014          | 0.005* | 1.009 | 1.003            | 1.015 | 0.002* | 1.006 | 1.000 | 1.012 | 0.063  |
| Tea                            | 1.000              | 0.999 | 1.001 | 0.782           | 1.000 | 0.999 | 1.001          | 0.906  | 1.000 | 0.999            | 1.001 | 0.687  | 1.000 | 0.999 | 1.001 | 0.946  |
| Vegetables                     | 1.000              | 0.997 | 1.003 | 0.879           | 0.999 | 0.997 | 1.002          | 0.615  | 0.999 | 0.997            | 1.002 | 0.654  | 1.000 | 0.997 | 1.003 | 0.974  |

Multinomial Logistic Regression Analysis is interpreted.

Model: gender, age, BMI, all 25 food groups.

<sup>1</sup> Observed variable is shown. Statistics were performed on  $\sqrt{\cdot}$ -transformed variable.

<sup>DP</sup> Variable was transformed when analyzing Disease Phenotype

<sup>DA</sup> Variable was transformed when analyzing Disease Activity

\* Significant difference between subgroup vs controls (p<0.05)
